# Supplementary material for: CD47 cross-dressing by extracellular vesicles expressing CD47 inhibits phagocytosis without transmitting cell death signals
Source: eLife. 2022 Dec 1;11:e73677. doi: 10.7554/eLife.73677 (PMC9714967; doi:10.7554/eLife.73677)
Supplement: Source data 1. [file elife-73677-data1.xlsx]

## Sheet: Fig 1
Fig 1. Transgenic hCD47 cross-dressing on pig cells.
Fig 1A. h/pCD47 staining MFI (n=6)
CD47p	CD47p+CD47p/h2	CD47p+CD47p/h4
380	1742	1761
394	1837	1857
377	1990	1933
401	2386	2099
401	2302	2171
384	2338	2245
Fig 1B. h/pCD47 staining MFI (n=3)
CD47null	CD47null+CD47h2	CD47null+CD47h4
8	2044	803
6.13	2169	832
5.86	2039	935
Fig 1B. huCD47 staining MFI (n=3)
CD47null	CD47null+CD47h2	CD47null+CD47h4
23.5	634	225
22.6	677	312
22.3	689	195
Analysis: two-tailed unpaired t-test

## Sheet: Fig 4
Fig 4. Protection against phagocytosis by cross-dressed CD47.
Fig 4C. Macrophage phagocyosis to huCD47 cross-dressed PAOC. (n=3)
	PAOC47null	PAOC47h2	hCD47+ coated PAOC47null
Violet+ in CD14+	27.9	16.5	16
	23.2	17.6	16.4
	26.9	21.6	19.2
Fig 4D. Macrophage phagocyosis to huCD47 cross-dressed Jurkat cells. (n=3)
	CD47KO	WT	EV-treated CD47KO
Violet+ in CD14+	36.8	18.8	16
	36.3	13.9	16.4
	38.6	13.5	16.5
Analysis: two-tailed unpaired t-test

## Sheet: Fig 5
Fig 5. Ligation of autogenous but not cross-dressed CD47 induces cell death.
Fig 5D. Human SIRPα ligation to autogenous CD47 on WT Jurkat cells induced cell death.
n=4	KO				WT
% Dead cells (PI+)	1.23	1.49	1	1.31	13.9	15.4	13.9	15.4
Fig 5F. Human SIRPα ligation to MV cross-dressed CD47 on CD47KO Jurkat cells did not induce cell death.
n=4	EV-KO				WT
% Dead cells (PI+)	1.06	1.16	1.01	1.13	10	11.5	11.6	11.4
Analysis: two-tailed unpaired t-test

## Sheet: Figure 2—figure supplement 2
Figure S4. Multiple membrane proteins are cross-dressed during cell co-culture.
	CD47 MFI	CD45 MFI	CD90 MFI	HLA-ABC MFI
co-cultured	2014	234	883	1007
	3156	400	1289	1149
	1776	202	779	1066
control	134	2.84	-197	140

## Sheet: Figure 2—figure supplement 3
Figure S5. A functional cytoskeleton is not absolutely required for but may facilitate hCD47 cross-dressing.
Fig S5A.
	Untreated	Cytochalasin D	Isotype
PKH26 MFI	1724	871	66
	1745	965
Fig S5B.
	Untreated	Cytochalasin D	Isotype
PKH26 MFI	9405	6592	66

## Sheet: Figure 3—figure supplement 1
Figure S6. Process of CD47 cross-dressing on pig LCL cells.
Fig S6A. Pig LCL incubated with EV from huCD47-pig LCL.
	control	1h	24h
CD47 MFI	272	1561	1512
Fig S6B. Pig LCL incubated with EV from WT Jurkat.
	control	1h	24h
CD47 MFI	272	826	1216

## Sheet: Figure 3—figure supplement 2
Figure S7. Cross-dressing involves membrane fusion, resits to trypsin/EDTA wash
	Control	EDTA	LCL
PKH26 MFI	64603	61082	7.7
	62436	63356
	60785	60638

## Sheet: Figure 5—figure supplement 1
Figure S8. SIRPα-Fc-induced cell death in WT Jurkat cells.
SIRPα-Fc (ug/ml)	0	0.6	1.5	2.4	5	10
WT Jurkat (PI+)%	2.11	1.83	7.53	15.6	20.7	32.3
CD47KO Jurkat (PI+)%	2.63	3.04	2.26	3.21	2.5	2.14

## Sheet: Figure 5—figure supplement 3
Figure S10. CD47 lentivirus-transduced CD47KO Jurkat cells are sensitive to apoptosis induced by CD47 agonists.
Fig S10A. Cell CD47 expression.
	CD47 MFI
WT Jurkat	41302
KO/CD47tghi	26206
KO/CD47tglo	7158
CD47KO Jurkat	501
Fig S10B. Cell apoptosis induced by SIRPa-FC.
SIRPα-Fc (ug/ml)	0	0.5	1	2
WT Jurkat (PI+)%	1.55	1.88	3.86	8.99
KO/CD47tghi (PI+)%	3.13	3.25	5.04	8.44
KO/CD47tglo (PI+)%	1.78	2.31	2.65	2.43
CD47KO Jurkat (PI+)%	1.71	2.05	2.54	2.19
Fig S10C. Cell apoptosis induced by anti-CD47 antibody CC2C6.
WT Jurkat (PI+)%	31.6
KO/CD47tghi (PI+)%	14.3
KO/CD47tglo (PI+)%	2.47
CD47KO Jurkat (PI+)%	1.56
